# Supplementary material
Source: PubMed Central journal article supplement (PMC1864970)
Supplement: 7601671s1.pdf [file 7601671s1.pdf]

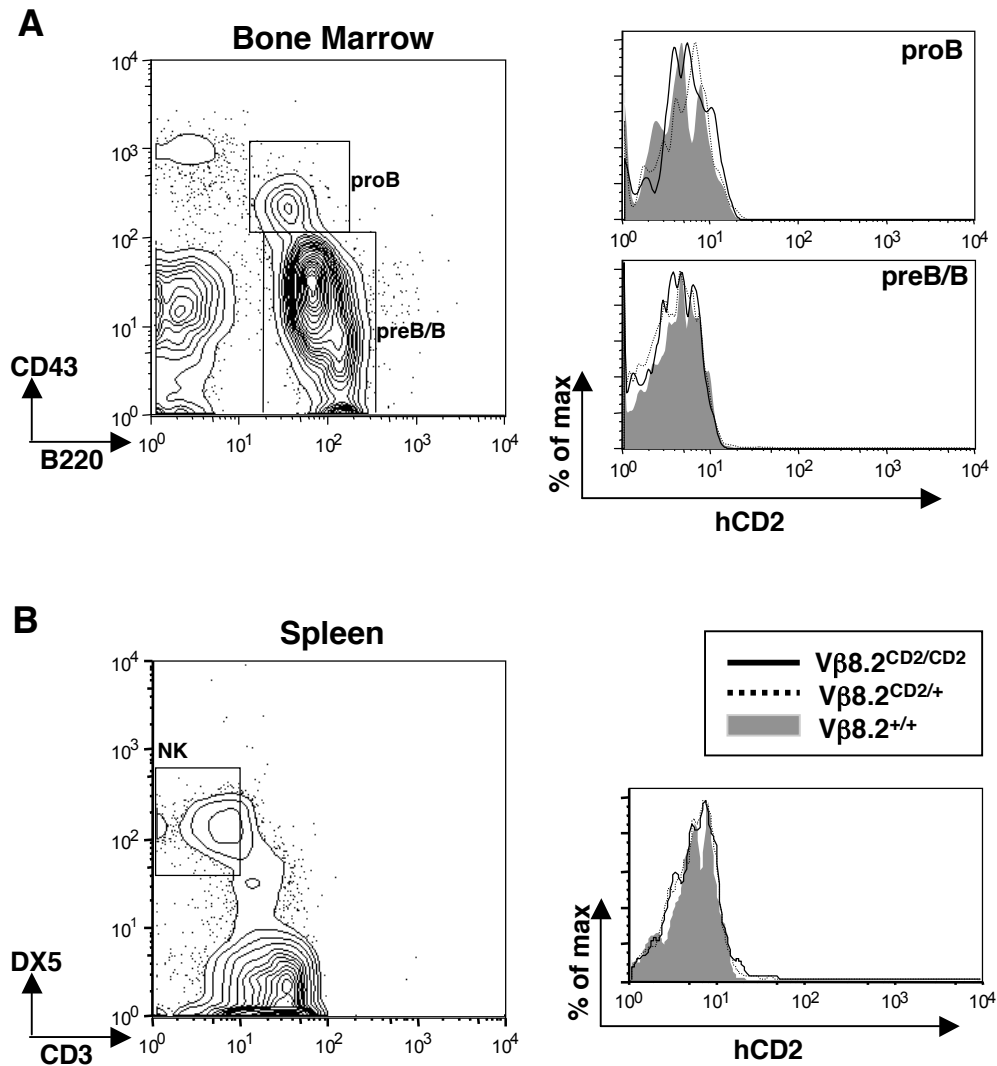

**Supplemental Figure 1. hCD2 expression in bone marrow proB and preB/B cells (A) and splenic NK cells (B).** Total Bone marrow cells were stained with FITC conjugated anti-CD43, APC conjugated anti-B220, PE conjugated anti-hCD2 and 7AAD. Total spleen cells were stained with PE conjugated anti-DX5, FITC conjugated anti-CD3, FITC conjugated anti-hCD2, PE-Cy5 conjugated B220 and 7AAD. Events that are shown in the contour plot are pre-gated on viable cells. hCD2 staining of the gated population from wild-type,  $V\beta 8.2^{CD2/+}$  and  $V\beta 8.2^{CD2/CD2}$  mice is presented as overlaid histogram.

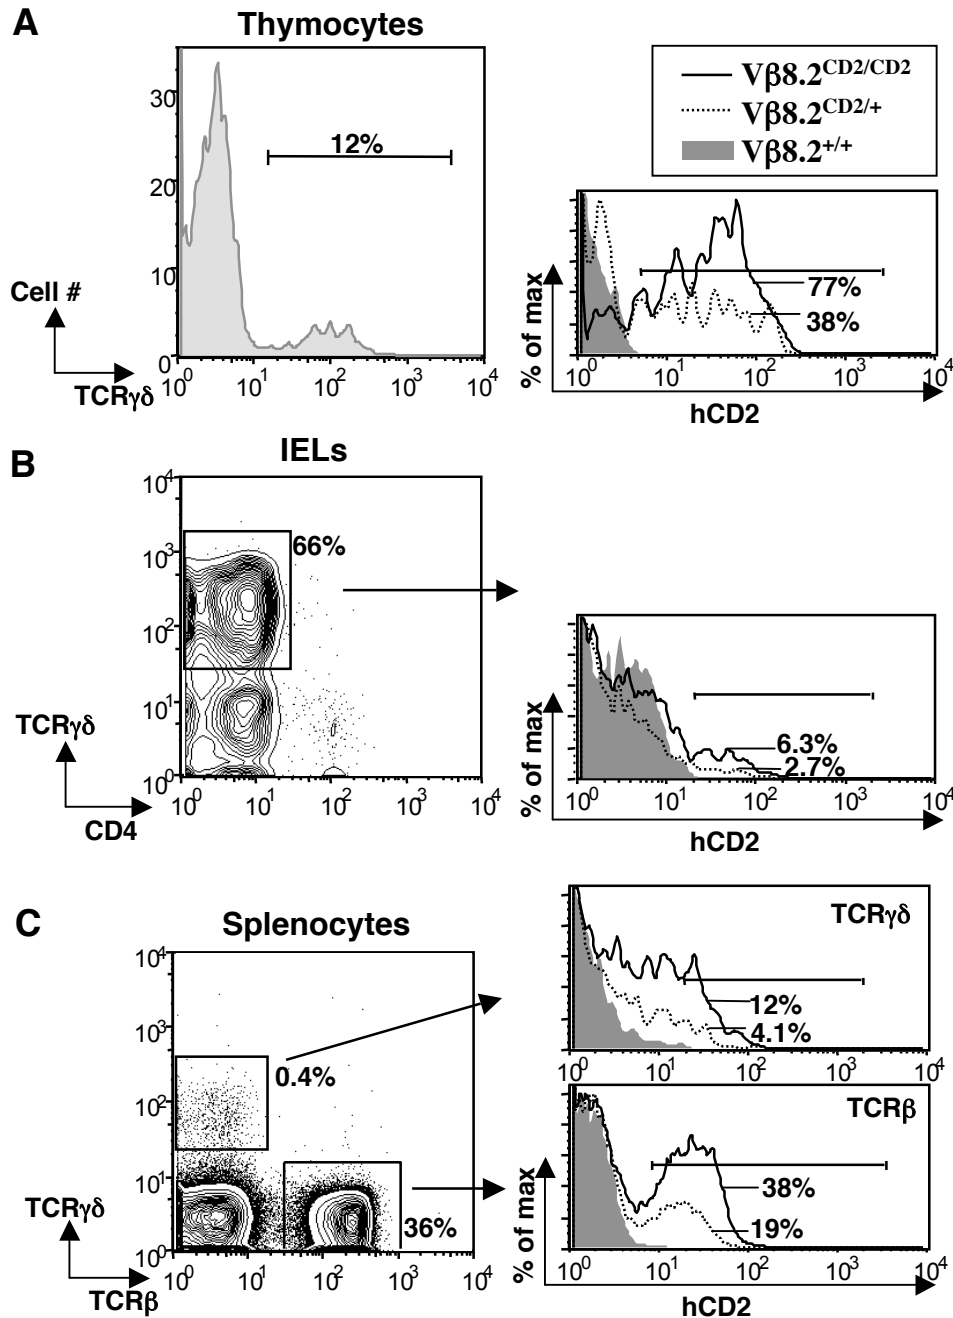

**Supplemental Figure 2. hCD2 expression in gdT cells.** hCD2 expression in thymic gdT cells (A), splenic gdT cells (B) and gdT cells in IELs (C) from 4~6-week old  $V\beta 8.2^{CD2/CD2}$ ,  $V\beta 8.2^{CD2/+}$  and wild type mice. The gating of gdT cells is indicated in the contour plots. hCD2 expression in gated T cells from  $V\beta 8.2^{CD2/CD2}$  (black line),  $V\beta 8.2^{CD2/+}$  (dotted line), and wild type (shade) mice is presented by overlaid histograms. Percentages of hCD2 positive cells are also shown in the histograms. Results are representative of at least 3 separate experiments.

### Supplemental Fig.3

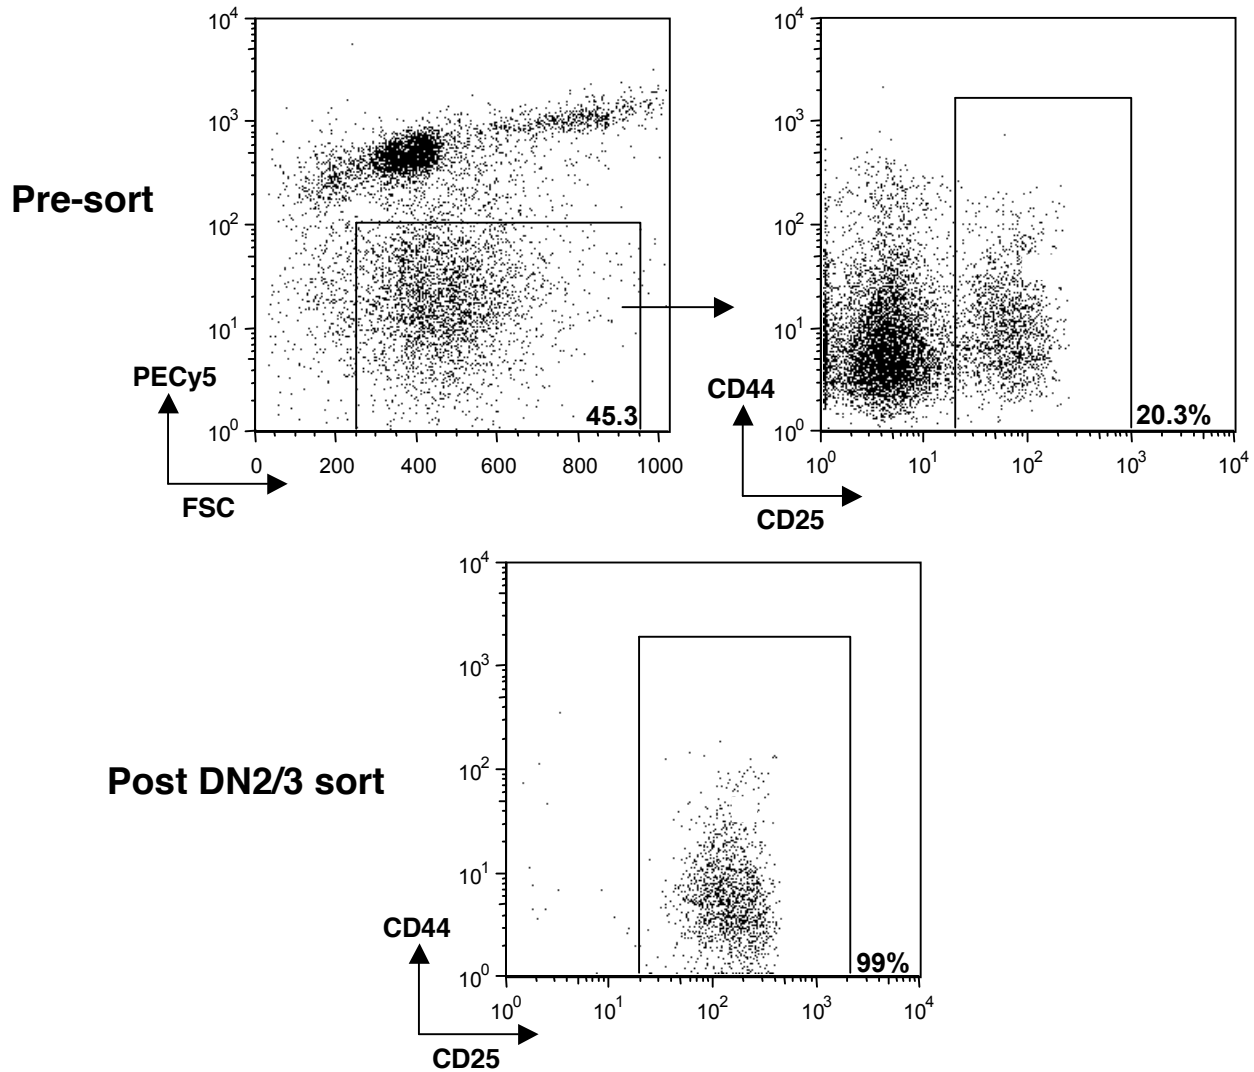

**Supplemental Figure 3. Gating and Purity of DN2/3 thymocyte sorting for quantitative PCR analysis.** Total thymocytes from wild-type,  $V\beta 8.2^{CD2/+}$  and  $V\beta 8.2^{CD2/CD2}$  mice were stained as described in *Method*. Gating and frequency of gated population in CD4/CD8 depleted thymocytes prior to sorting are shown in the pre-sort dot plot. A small fraction of sorted cells were subjected to four-color FACS analysis directly after cell sorting. Purity of sorted DN2/3 thymocytes is shown in the post sort dot plot. Events are pre-gated on viable cells. Graphs of wild-type sample are shown as a representative of all three genotypes.

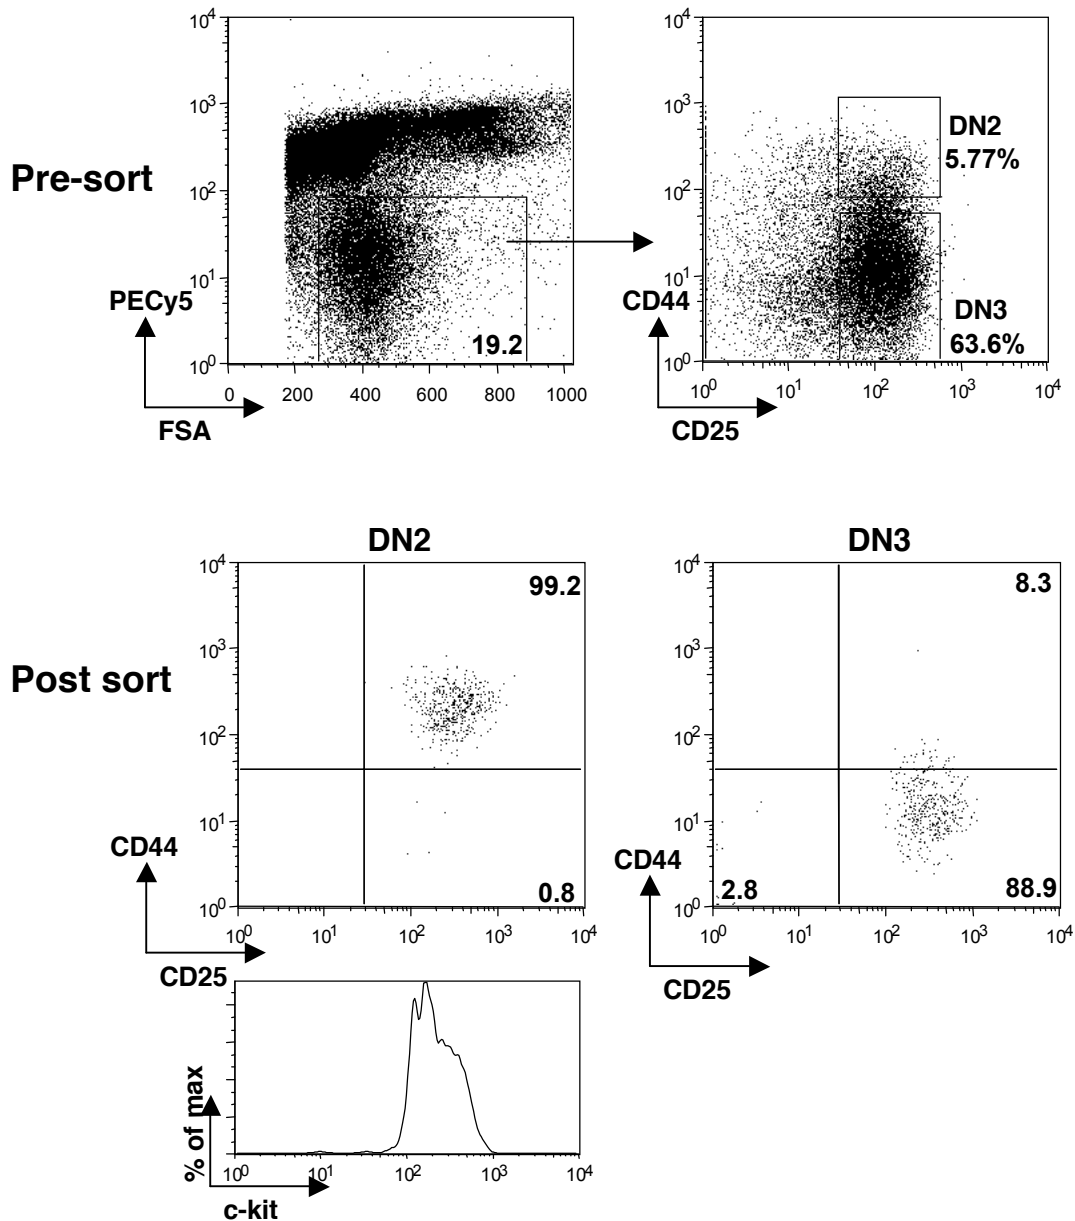

**Supplemental Figure 3. Gating and purity of DN2 and DN3 thymocyte sorting for quantitative PCR analysis.** Total thymocytes from B6 and SJL/B6 F1 mice were stained as described in *Method*. Cells were enriched for CD25 positive staining on AUTO MACS before sorting. Gating and frequency of DN2 and DN3 cells were shown in pre-sort plot. A small fraction of sorted cells were subjected to four-color FACS analysis directly after cell sorting. Events that are shown in the plots are pre-gated on viable cells. c-kit expression in sorted DN2 thymocytes is also shown as histogram. Graphs of B6 sample are shown as a representative of both strains.

**Supplemental Table 1. Primer sequence used for quantitative PCR analysis.**

|                        |                                                     |                                                                                                                                                       |
|------------------------|-----------------------------------------------------|-------------------------------------------------------------------------------------------------------------------------------------------------------|
| GAPDHfor               | 5'- CCT GGA GAA ACC TGC<br>CAA GTA TG -3'           | Forward primer for GAPDH                                                                                                                              |
| GAPDHrev               | 5'-AGA GTG GGA GTT GCT<br>GTT GAA GTC 3'            | Reverse primer for GAPDH                                                                                                                              |
| TCRV $\beta$ 8.2for    | 5'-ATG GTG CTG GCA GCA<br>CTG AG-3'                 | Specific for TCR V $\beta$ 8.2 exon;<br>Forward primer for V $\beta$ 8.2 <sup>CD2</sup><br>knock-in allele germline<br>transcription                  |
| LoxPrev                | 5'-CTT CGA ATA GCA TAC<br>ATT ATA CGA AGT TAT CC-3' | Specific for loxP sequece;<br>Reverse primer for V $\beta$ 8.2 <sup>CD2</sup><br>knock-in allele germline<br>transcription                            |
| TCRV $\beta$ 8.2L/efor | 5'-CTC CTG TGT TCA AAA<br>CAC ATG GAG G -3'         | Specific for 3' of TCRV $\beta$ 8.2<br>leading exon and 5' of<br>TCRV $\beta$ 8.2 exon; Forward<br>primer for V $\beta$ 8.2 germline<br>transcription |
| TCRV $\beta$ 8.2R4GL   | 5'-GGA ACT TTC TTA GGT<br>ACA CAG GCA C -3'         | Reverse primer for V $\beta$ 8.2<br>germline transcription                                                                                            |
| TCRV $\beta$ 4L/efor   | 5'-TCC TGG TGG CAG GTC<br>CAG TCG ACC -3'           | Specific for 3' of TCRV $\beta$ 4<br>leading exon and 5' of TCRV $\beta$ 4<br>exon; Forward primer for V $\beta$ 4<br>germline transcription          |
| TCRV $\beta$ 4 R4GL    | 5'- GAC CAG TTA CAT CAA<br>CAG TTT CCT GG-3'        | Reverse primer for V $\beta$ 4<br>germline transcription                                                                                              |
| TCRV $\beta$ 5.1L/efor | 5'-CCT GGG AAC AAG TTC<br>AGC AAA TTC -3'           | Specific for 3' of TCRV $\beta$ 5.1<br>leading exon and 5' of<br>TCRV $\beta$ 5.1 exon; Forward<br>primer for V $\beta$ 5.1 germline<br>transcription |
| TCRV $\beta$ 5.1R4GL   | 5'-CCT CTC CAG TAC ATC<br>ACC AGC TGG -3'           | Reverse primer for V $\beta$ 5.1<br>germline transcription                                                                                            |
| TCRV $\beta$ 12L/efor  | 5'-CCT TGA CAC AGT ACT<br>GTC TGA AGC -3'           | Specific for 3' of TCRV $\beta$ 12<br>leading exon and 5' of<br>TCRV $\beta$ 12 exon; Forward<br>primer for V $\beta$ 12 germline<br>transcription    |
| TCRV $\beta$ 12 R4GL   | 5'-CCA TGG AGT ATA AGA<br>AAT AGT CCC AGG -3'       | Reverse primer for V $\beta$ 12<br>germline transcription                                                                                             |
